# Supplementary material for: Dual-Channel Stopped-Flow Apparatus for Simultaneous Fluorescence, Anisotropy, and FRET Kinetic Data Acquisition for Binary and Ternary Biological Complexes
Source: MDPI journal article supplement (doi:10.3390/bios10110180), 2020-11-19
Supplement: s1 [file s1]

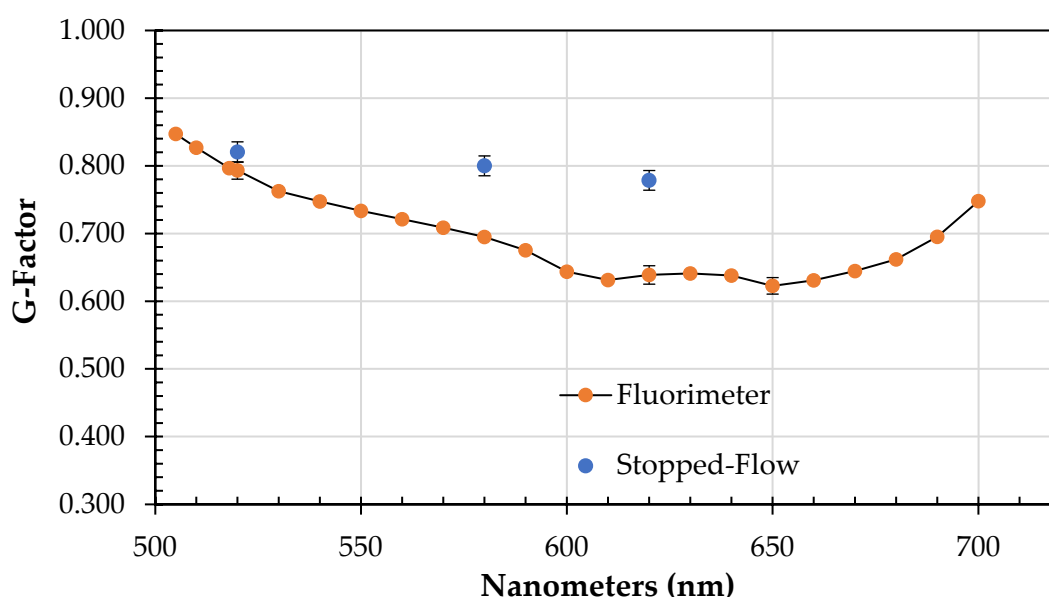

**Figure S1. The grating-factor of the fluorimeter and the stopped-flow.** The SF G-factor (blue dots) was obtained by triplication through the 520-nm, 580-nm, and 620-nm interference filters and a polarizer at the vertical and horizontal position to acquire the  $I_{HV}/I_{HH}$  ratio with scans of 3-5 secs. The excitation Ar<sup>+</sup> laser and sample concentrations were those described in the experimental section of each of the association reactions. The fluorimeter's G-factor (orange dots) was obtained from 500-700 nm by measuring the  $I_{HV}/I_{HH}$  ratio acquired by polarizers with 3-5 s scans carried out by triplicated with a step size of 5-10 nm and the emission monochromator bandwidth set at 1 turn. The fluorimeter G-factor calculations required an AdMLP<sub>14ds</sub>\*Fl solution at a concentration of 0.5  $\mu$ M, to yield the values in the 500-590 nm range. The fluorimeter G-factor in the 580-700 nm range was acquired by a solution of Xr\*AdMLP<sub>14ds</sub> at a concentration of 4.7  $\mu$ M at excitations of 510 nm and 560 nm.

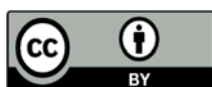

© 2020 by the authors. Submitted for possible open access publication under the terms and conditions of the Creative Commons Attribution (CC BY) license (<http://creativecommons.org/licenses/by/4.0/>).
